# Supplementary material for: Financing conservation at scale via visitor green fees
Source: Frontiers journal article supplement (doi:10.3389/fevo.2022.1036132), 2022-12-20
Supplement: Data_Sheet_1.docx [file Data_Sheet_1.docx]

**Supplementary Material**

**Appendix A. Visitor Green Fee Programs**

The following elaborates on the visitor green fee programs outlined in Table 1.

PALAU *PRISTINE PARADISE ENVIRONMENTAL FEE*.

Palau’s *Pristine Paradise Environmental Fee* (PPEF) is an exemplar green tourist fee. Palau is recognized as a global leader in conservation, establishing the Palau National Marine Sanctuary in 2015 to protect 500,000 sq. kilometers of marine waters, making it one of the largest marine protected areas in the world. In order to finance the marine sanctuary and Palau’s protected area network, all international airline tickets to Palau include the US$100 *Pristine Paradise Environmental Fee* (PPEF). Palau’s fund management is a public-private collaboration. Of each $100 fee, $10 is allocated to the Fisheries Protection Fund (FPF), which is a fund within the National Treasury with the mission to fund the Palau National Marine Sanctuary and the laws related to it, administer activities related to the enforcement of the sanctuary, and promote eco-tourism. An amendment in June of 2019 assigned $5 per visitor from the FPF to the Palau International Coral Reef Center (PICRC) to support the PICRC’s newly expanded role in managing the marine sanctuary (Ministry of Natural Resources, Environment, & Tourism, 2019). Another $12.50 of each $100 fee is divided among the states such that 70% goes to the states in equal shares, and the remaining 30% is allocated in proportion with each state’s population. Of each $100 fee, $25 goes directly to the National Treasury and is then earmarked to the appropriate agencies with the purpose of funding maintenance and improvement of the Palau International Airport. An additional $22.50 per fee is allocated to the National Treasury. An additional $30 of each fee is managed by the Protected Areas Network (PAN) Fund, a non-profit organization established by the Republic of Palau to act as a financial trustee for the monies acquired from international donations and visitor arrival fees to support the PAN sites (Kesolei, 2018).

NEW ZEALAND *INTERNATIONAL VISITOR CONSERVATION AND TOURISM LEVY*.

In July 2019, New Zealand (Aotearoa) implemented an *International Visitor Conservation and Tourism Levy* (IVL), a green visitor entry fee of NZ$35 per visitor. Certain visitors are exempt from paying the IVL, such as those traveling with a passport from Pacific Island nations or Australia. The IVL is collected electronically using the nation’s new Electronic Travel Authority (NZeTA) visa platform (Ministry of Business, Innovation & Employment, 2020). Prior to the COVID-19 pandemic, the tax was expected to generate around NZ$450 million over the first five years (New Zealand Government, 2021). The revenue from the IVL is split 50:50 between tourism and conservation investment projects, with the following four pillars and revenue distributions: biodiversity (35-40%), response to visitor impact on environment (10-15%), tourism strategic infrastructure (40-45%), and tourism systems (5-10%). New Zealand’s Ministry of Business, Innovation, and Employment releases annual impact reports that include both financial and project impact reporting (MBIE, 2021).

BRITISH VIRGIN ISLANDS *ENVIRONMENTAL AND TOURISM LEVY.*

In 2017, the British Virgin Islands (BVI) implemented a US$10 *Environmental and Tourism Levy* to fund activities in accordance with the Environmental Protection and Tourism Improvement Fund Act of 2017. These funds can be used to minimize impacts from climate change and maintain tourism sites (Ministry of Finance, 2017). Exemptions from the fee include: (1) Residents & Belongers, (2) non-residents two years or under, (3) Officers of the Eastern Caribbean Supreme Court, (4) Guests of the Government, (5) Official representatives of Governments of any country/territory, (6) Persons granted diplomatic privileges, and (7) Persons exempted by the Minister (Ministry of Finance, 2018). This fee was instituted on top of BVI’s $20 departure tax, which is included in the airline ticket. Unlike the departure tax, the *Environmental and Tourism Levy* is paid upon arrival at ports of entry, and is required of both air arrivals and cruise ship passengers (Government of the Virgin Islands, 2017).

MALDIVES *GREEN TAX.*

In 2015, the Maldives implemented a *Green Tax*. This US$6 tax is assessed per day at resorts and hotels. Maldivians and those with resident permits are not required to pay the *Green Tax* (Maldives Inland Revenue Authority, 2022). Over the past few years, guesthouses have been exempted from this fee, subjected to this fee, and subjected to a smaller fee of US$3 to reflect the lower cost of the guesthouse accommodation. According to Maldives Island Revenue Authority, the progressive green tax structure ($6; $3) has been in place since October, 2016 and continues to be. The *Green Tax* revenue is allocated to beach protection, wastewater, sewage, and water management projects via the Green Fund (Avas, 2022).

BHUTAN *SUSTAINABLE DEVELOPMENT FEE.*

The small landlocked Kingdom of Bhutan historically charged visitors US$200 - $250 per day, depending on the season. Until September 2022, this daily fee included accommodations, meals, licensed Bhutanese tour guides, internal transportation, internal taxes, and camping equipment. Of this daily experience fee, US$65 accounted for a sustainable tourism royalty. The revenue from the sustainable tourism portion of the tourist tariff funded a range of initiatives from organic farming, to free education and health care, poverty alleviation projects, and infrastructure maintenance and development (Bindloss, 2022), all aligning with Bhutan’s mission and metric of gross domestic happiness. Since opening to tourism in 1974 and implementing the original US$130/night tourism fee (Dorji, 2022), Bhutan has embraced a “high value, low volume” sustainable tourism growth model (Rinzin, Vermeulen, & Glasbergen, 2007). When Bhutan reopened to tourism after the COVID-19 pandemic in September, 2022, the government restructured the fee increasing the US$65 *Sustainable Development Fee* to US$200, no longer inclusive of amenities and travel package items. In previous and current fee structures, nationals from Bangladesh, Maldives, and India have fee exemptions or pay concessional fees (Dorji, 2022). The government intends to use the new and increased fee revenue to offset the tourism economy carbon footprint and invest in carbon-neutral infrastructure (Bindloss, 2022).

RIVIERA MAYA, MEXICO *ECO TAX.*

On October 1, 2017 the region of Riviera Maya established an *Eco Tax* “to help maintain the beaches and ecosystems in Riviera Maya” (Rosen, 2017). This small fee was progressively eased in, starting as 10mp per room per night for the first three months before ramping up to 20mp per room per night on January 1, 2018. These nightly hotel fees are assessed by hotels and deposited into an environmental trust fund (Rosen, 2017). The Riviera Maya and Cancun are separate jurisdictions with different green fee mechanisms, and hence are discussed separately.

CANCUN, MEXICO *ENVIRONMENTAL SANITATION FEE.*

In 2019, Puerto Morelos and Cancun/Benito Juarez each instituted *Environmental Sanitation Fees*. The fees are assessed at all hotels and resorts in these two cities. The fee structure ranges from $25.34 pesos per room night to $50.68 pesos per villa night. The revenues are used for beach cleaning, water treatment, waste collection, LED lighting, reef conservation, wetland management, reforestation programs, other sustainability programs (Arteaga, 2019). The implementation of these fee systems was motivated by concern that visitor numbers were outpacing the development of public services, especially pertaining to water and waste treatment.

EL NIDO, PHILIPPINES *ECO-TOURISM DEVELOPMENT FEE.*

The municipality of El Nido in the Philippines requires an *Eco-Tourism Development Fee* (ETDF) for non-Palawan residents of PHP 200 valid for 10 days or PHP 500 valid for more than 10 days. This entrance fee is collected by the visitors’ booking office or tour guide and then transferred to the municipality. The ETDF is one of the older green tourist finance mechanisms, having been established in 2008 (El Nido Paradise, 2015). Unfortunately, the fee is not substantial enough to offset the impact of tourism on the region’s environment. The fee collects an estimated PHP 3million, while an estimated PHP 10million is needed to manage ecosystems. The revenue that is generated is managed by the ETDF Task Force comprised of people’s organizations, government offices, and NGOs, and is allocated as outlined below (El Nido Paradise, 2015; Josiah, 2011).

• 50% is allocated to environment and tourism related projects

• 10% barangay eco-tourism projects

• 10% Protected Area Management Board

• 10% general fund of Municipal Government

• 20% implementation costs

MENTAWAIS, INDONESIA *SURFER TAX*

In 2016, the Mentawai regency enacted an IDR 1,000,000 *Surfer Tax* valid for fifteen days (Regional Law No.08, Nov 25 2015). Surfers are required to wear a bracelet in the water to show they have paid. Enforcing over 70 surf spots accessed by land-based resorts and boats is a costly endeavor. In addition to the high administrative costs, opposition of the fee stems from a mistrust in how the government will allocate and administer the revenue. While stakeholders hope the revenue will support the local community and carrying capacity management, a source outlining expenditures and project impacts was not available for our research. Thus, it is unclear to what extent the *Mentawais Surfer Tax* is a *green* fee (Macaronis, 2016; Townsend, 2016).

BALEARIC ISLANDS, SPAIN *SUSTAINABLE TOURISM TAX*

In 2016, the Balearic Islands instituted a *Sustainable Tourism Tax*, also referred to as *Eco Tax*. This eco tax is assessed at accommodations and varies depending on the luxury level of the accommodation: 2 euros at 5 and 4 star hotels, 1.5 euros at 4 and 3 star hotels, and 1 euro at 1, 2, and 3 star hotels. Exemptions include children under 16 years old. Similarly, the fee is discounted by 50% in the off season. The revenue supports over 170 sustainable tourism projects ranging from visitor education on marine ecosystems to investments in water infrastructure projects (Golledge, 2021; Newsroom Spain, 2021).

**Appendix A References**

Arteaga, E. (2019). New Environmental Fee for all Hotel Guests in Cancun on March 1. Retrieved April 22, 2021, from Royal Resorts website: https://www.royalresorts.com/blog/news/new-environmental-fee-for-all-hotel-guests-in-cancun-on-march-1/

Avas. (2022). State receives estimated amount in Green Tax revenue [News]. Retrieved November 29, 2022, from Avas Online website: https://avas.mv/en/125222

Bindloss, J. (2022, September 22). Bhutan reopens this week—But its tourist fees just got a lot more expensive. Retrieved November 29, 2022, from Lonely Planet website: https://www.lonelyplanet.com/news/bhutan-daily-tourist-fee-increase

Dorji, S. (2022, June 28). Bhutan set to raise SDF to 200 USD [News]. Retrieved November 29, 2022, from Daily Bhutan website: http://www.dailybhutan.com/article/bhutan-set-to-raise-sdf-to-200-usd

El Nido Paradise. (2015, August 10). What is El Nido’s Eco-Tourism Development Fee (ETDF)? Retrieved June 7, 2021, from El Nido Paradise website: https://www.elnidoparadise.com/el-nido-eco-tourism-development-fee/

Golledge, D. (2021, March 18). How the Balearic Eco-Tax is preserving the islands’ heritage. Retrieved November 29, 2022, from Travel Weekly website: http://travelweekly.co.uk/destinations/how-the-balearics-are-protecting-the-environment-while-preserving-the-islands-heritage

Government of the Virgin Islands. (2017). Environmental and Tourism Levy | The British Virgin Islands. Retrieved June 7, 2021, from https://www.bvitourism.com/environmental-and-tourism-levy-0

Josiah. (2011, October 31). Eco-Tourism Development Fee of El Nido, Palawan. Retrieved November 29, 2022, from Lakas ng Trip website: https://www.lakas.com.ph/eco-tourism-development-fee-of-el-nido-palawan/

Kesolei, O. K. (2018). Palau Collects $100 Pristine Paradise Fee. Retrieved April 22, 2021, from Palau-news website: https://www.pacificnote.com/single-post/2018/01/11/pay-extra-cost-to-enter-the-pristine-paradise

Macaronis. (2016, August 7). MENTAWAI SURFER TAX. Retrieved November 29, 2022, from Macaronis Resort website: https://www.macaronisresort.com/announcement-surfer-tax/

Maldives Inland Revenue Authority. (2022). What is Green Tax? Retrieved November 29, 2022, from MIRA - Maldives Inland Revenue Authority website: https://www.mira.gov.mv/GreenTax.aspx

MBIE. (2021). Annual Performance Report 2020/21 |. Retrieved November 29, 2022, from New Zealand Government website: https://www.mbie.govt.nz/immigration-and-tourism/tourism/tourism-funding/international-visitor-conservation-and-tourism-levy/ivl-annual-performance-reports/annual-performance-report-2020-21/

Ministry of Business, Innovation & Employment. (2020). How the IVL works. Retrieved April 24, 2021, from https://www.mbie.govt.nz/immigration-and-tourism/tourism/tourism-funding/international-visitor-conservation-and-tourism-levy/how-the-ivl-works/

Ministry of Finance. (2017, July). Environmental Levy Takes Effect September 1 | Government of the Virgin Islands. Retrieved November 29, 2022, from Government of the Virgin Islands website: http://www.bvi.gov.vg/media-centre/environmental-levy-takes-effect-september-1

Ministry of Finance. (2018, May 25). Visitors Reminded Of Environmental And Tourism Levy | Government of the Virgin Islands. Retrieved November 29, 2022, from Government of the Virgin Islands website: https://bvi.gov.vg/media-centre/visitors-reminded-environmental-and-tourism-levy

Ministry of Natural Resources, Environment, & Tourism. (2019). *Updates from the Ministry*. Palau: Government of Palau, Ministry of Natural Resources, Environment and Tourism. Retrieved from Government of Palau, Ministry of Natural Resources, Environment and Tourism website: www.palaugov.pw/mnret-monthly-newsletter

New Zealand Government. (2021). *International Visitor Conservation and Tourism Levy (IVL) Programme – Annual Performance Report 2019/20*.

Newsroom Spain. (2021, February 25). THE BALEARIC ISLANDS TOURISM AUTHORITIES OUTLINE SUSTAINABLE TOURISM AS CENTRAL PART OF POST-COVID-19 STRATEGY. Retrieved November 29, 2022, from THE BALEARIC ISLANDS TOURISM AUTHORITIES OUTLINE SUSTAINABLE TOURISM AS CENTRAL PART OF POST-COVID-19 STRATEGY website: https://socialnewsroom.spain.info/the-balearic-islands-tourism-authorities-outline-sustainable-tourism-as-central-part-of-post-covid-19-strategy/

Rinzin, C., Vermeulen, W., & Glasbergen, P. (2007). Ecotourism as a mechanism for sustainable development: The case of Bhutan. *Environ Sci*, *4*. https://doi.org/10.1080/15693430701365420

Rosen, C. (2017). Mexico Implements New Tourism Tax. Retrieved June 7, 2021, from Travel Market Report website: https://www.travelmarketreport.com/articles/Mexico-Implements-New-Tourism-Tax

Townsend, L. (2016, March 8). New surfer tax for Mentawais. Retrieved November 29, 2022, from Stab Mag website: https://stabmag.com/news/new-surfer-tax-for-mentawais/
